# Supplementary material
Source: MDPI journal article supplement (https://www.mdpi.com/2072-4292/12/17/2827)
Supplement: s1 [file s1]

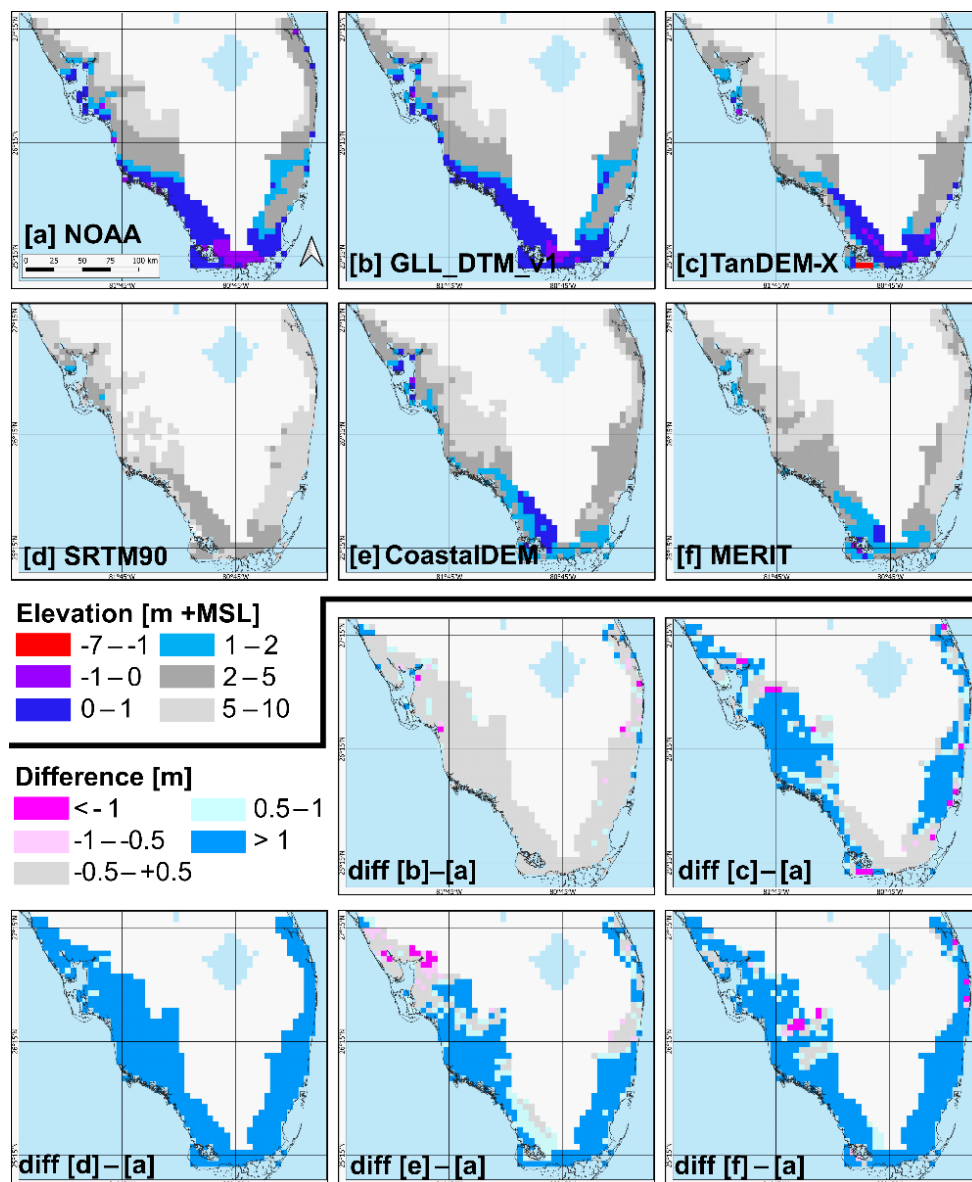

**Figure S1.** Comparison of GLL\_DTM\_v1 and GDEMs with the local DTM for the Everglades (NOAA sea-level rise DEM) [34]. Top two panels: [a] NOAA sea-level rise DEM, [b] GLL\_DTM\_v1, [c] TanDEM-X, [d] SRTM90, [e] CoastalDEM, [f] MERIT. Bottom two panels: Difference maps between NOAA sea-level rise DEM and GLL\_DTM\_v1, TanDEM-X, SRTM90, CoastalDEM, and MERIT. Differences are only shown where Everglades is lower than 10 m + MSL.

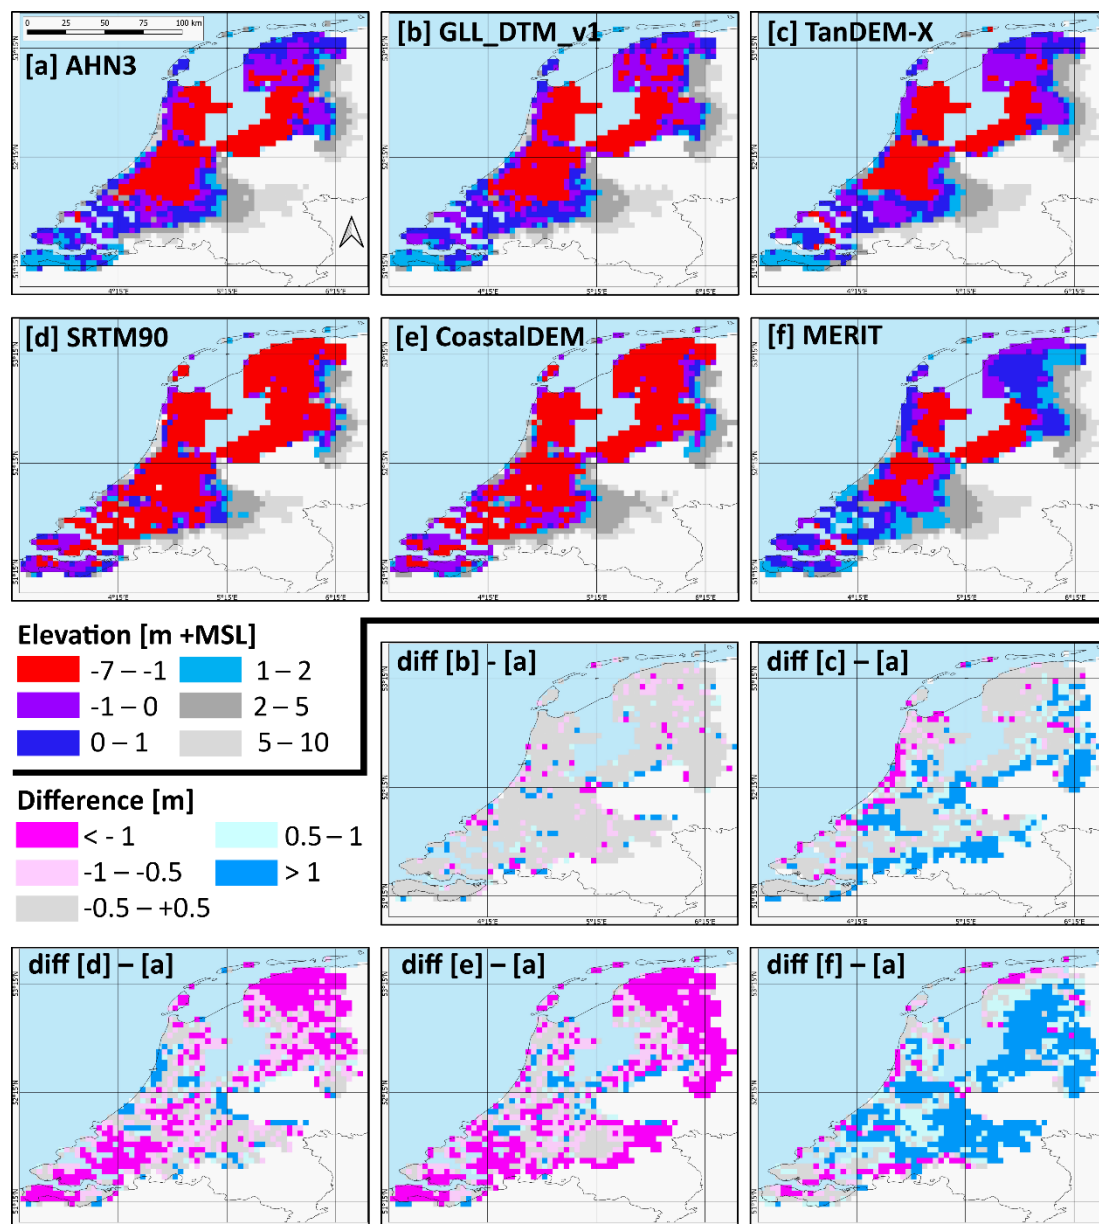

**Figure S2.** Comparison of GLL\_DTM\_V1 and GDEMs with the local DTM for the Netherlands (AHN3; [35]). Top two panels: [a] AHN3, [b] GLL\_DTM\_V1, [c] TanDEM-X, [d] SRTM90, [e] CoastalDEM, [f] MERIT. Bottom two panels: Difference maps between AHN3 and GLL\_DTM\_v1, TanDEM-X, SRTM90, CoastalDEM, and MERIT. Differences are only shown where AHN3 is lower than 10 m +MSL.
